# Supplementary material for: Advanced scanning electron microscopy techniques for structural characterization of zeolites
Source: Royal Society of Chemistry journal article supplement (doi:10.1039/d2qi00952h), 2022-01-01
Supplement: d2qi00952h1.pdf [file d2qi00952h1.pdf]

「Advanced scanning electron microscope techniques for the structural characterization of zeolites」

Natsuko Asano<sup>a</sup>, Shunsuke Asahina<sup>a</sup>, Jinfeng Lu<sup>a</sup>, □Jiani Xu<sup>b</sup>, Yanfeng Shen<sup>b</sup>, Zhengxing Qin<sup>b</sup> and Svetlana Mintova<sup>b,c</sup>

<sup>a</sup>JEOL Ltd., 3-1-2 Musashino, Akishima, Tokyo, 196-8558, Japan

<sup>b</sup> State Key Laboratory of Heavy Oil Processing, College of Chemical Engineering, China University of Petroleum (East China), Qingdao, 266580, China

<sup>c</sup>Normandie Univ, ENSICAEN, UNICAEN, CNRS, Laboratoire Catalyse et Spectrochimie, 6 Boulevard Maréchal Juin, 14050 Caen, France.

Corresponding authors: Shunsuke ASAHINA and Zhengxing QIN

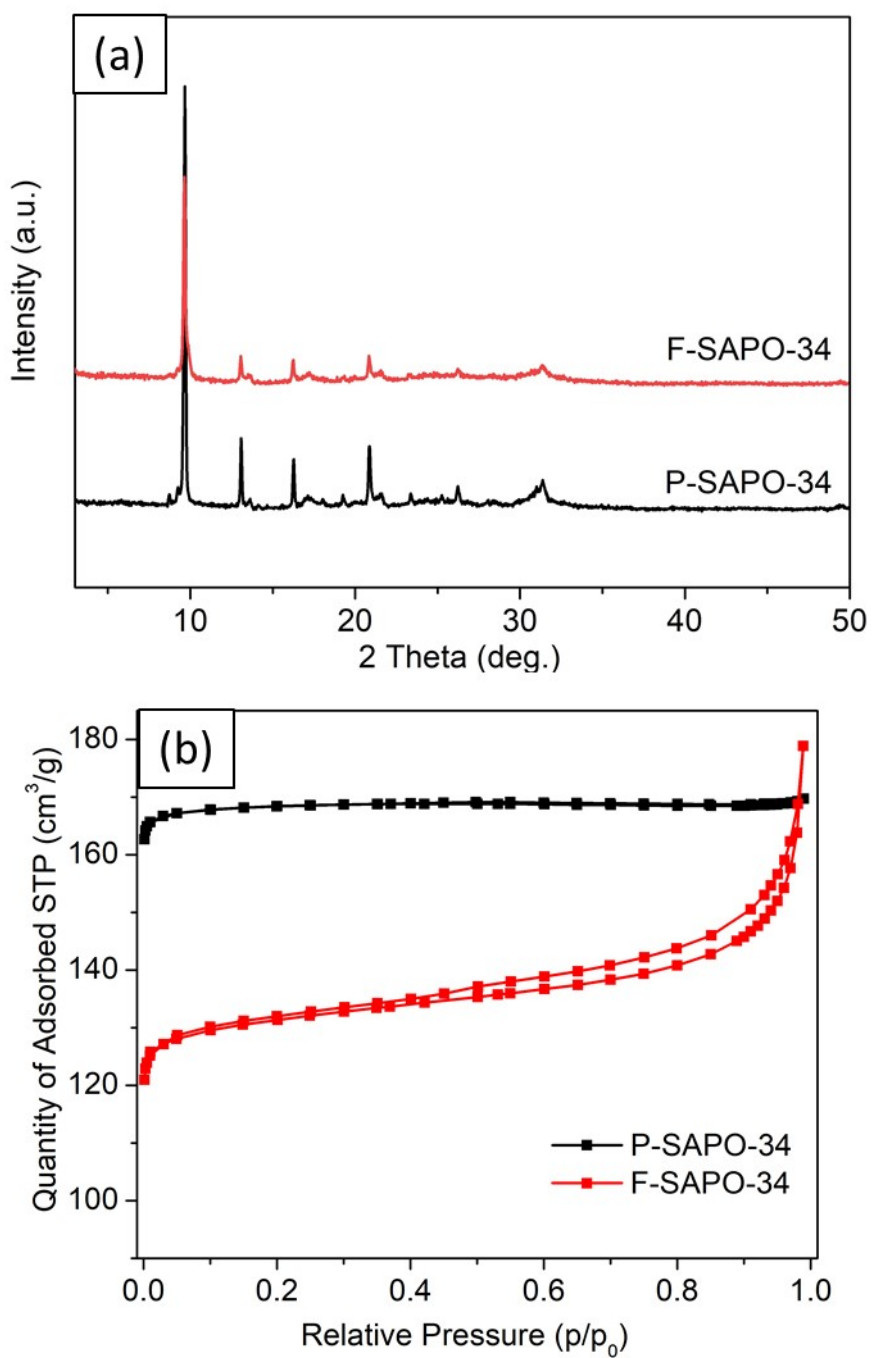

Figure S1. (a) X-ray diffraction (XRD) patterns and (b) N<sub>2</sub> sorption isotherm of as-synthesized and post-treated ZSM-5 and SAPO-34 samples.

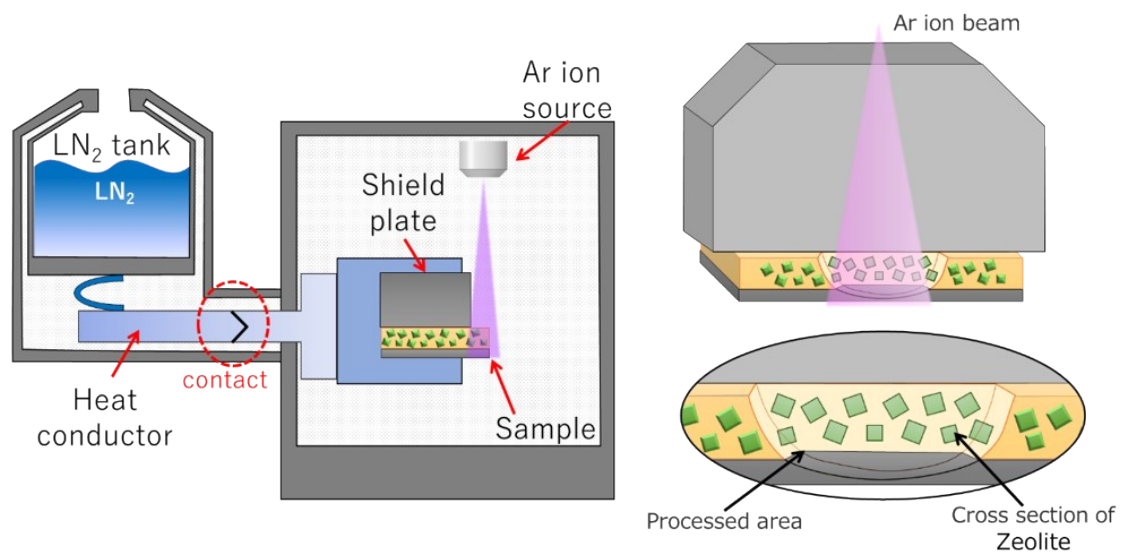

Figure S2. Schematic presentation for preparation of samples technology.
